# Supplementary material for: 1.女子大学生の消費行動・性格特性と消費者被害の関連
Source: eLife journal article supplement (doi:10.7554/elife.36741), 2003-01-15
Supplement: supp [file elife-36741-supp-v1.zip]

## Bacteria

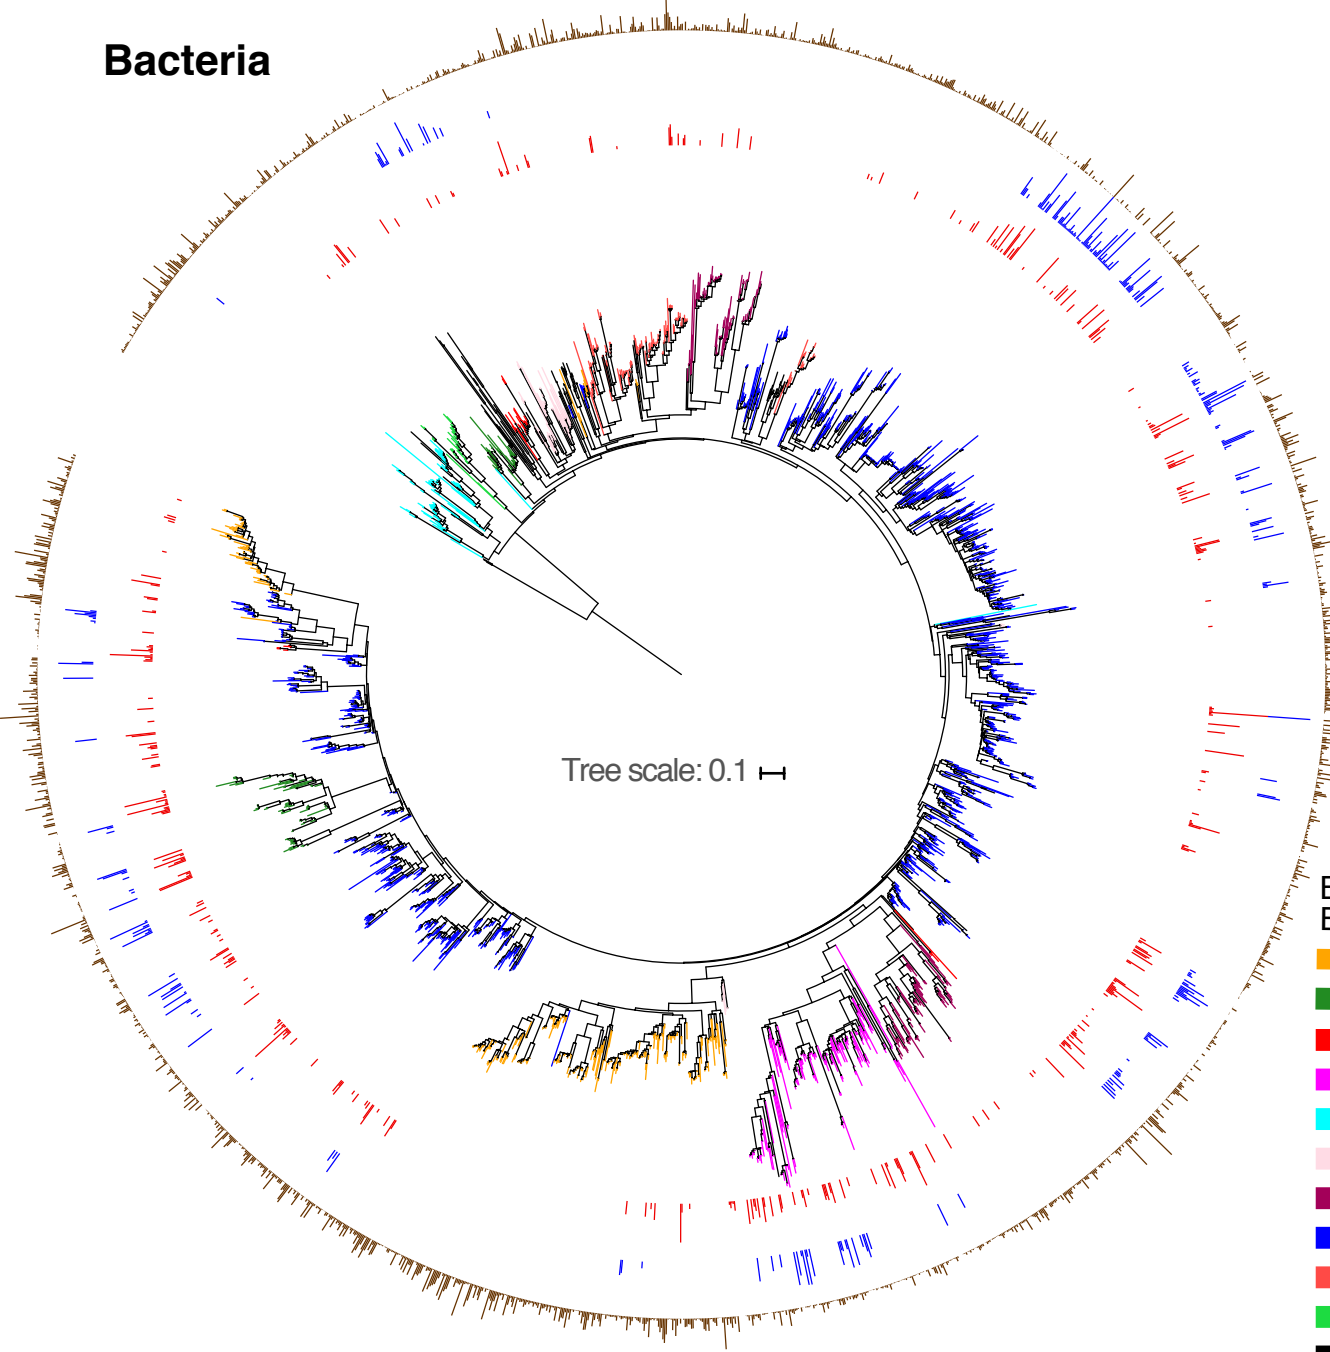

### Outer Rings Legend:

#### Habitat:

- Bog water or soil
- *Nepenthes*
- *Sarracenia*

### Branch Color Legend:

#### Bacterial Phyla

- Acidobacteria
- Actinobacteria
- Armatimonadetes
- Bacteroidetes
- Cyanobacteria
- Firmicutes
- Planctomycetes
- Proteobacteria
- Verrucomicrobia
- WPS-2
- Other

## Eukaryotes

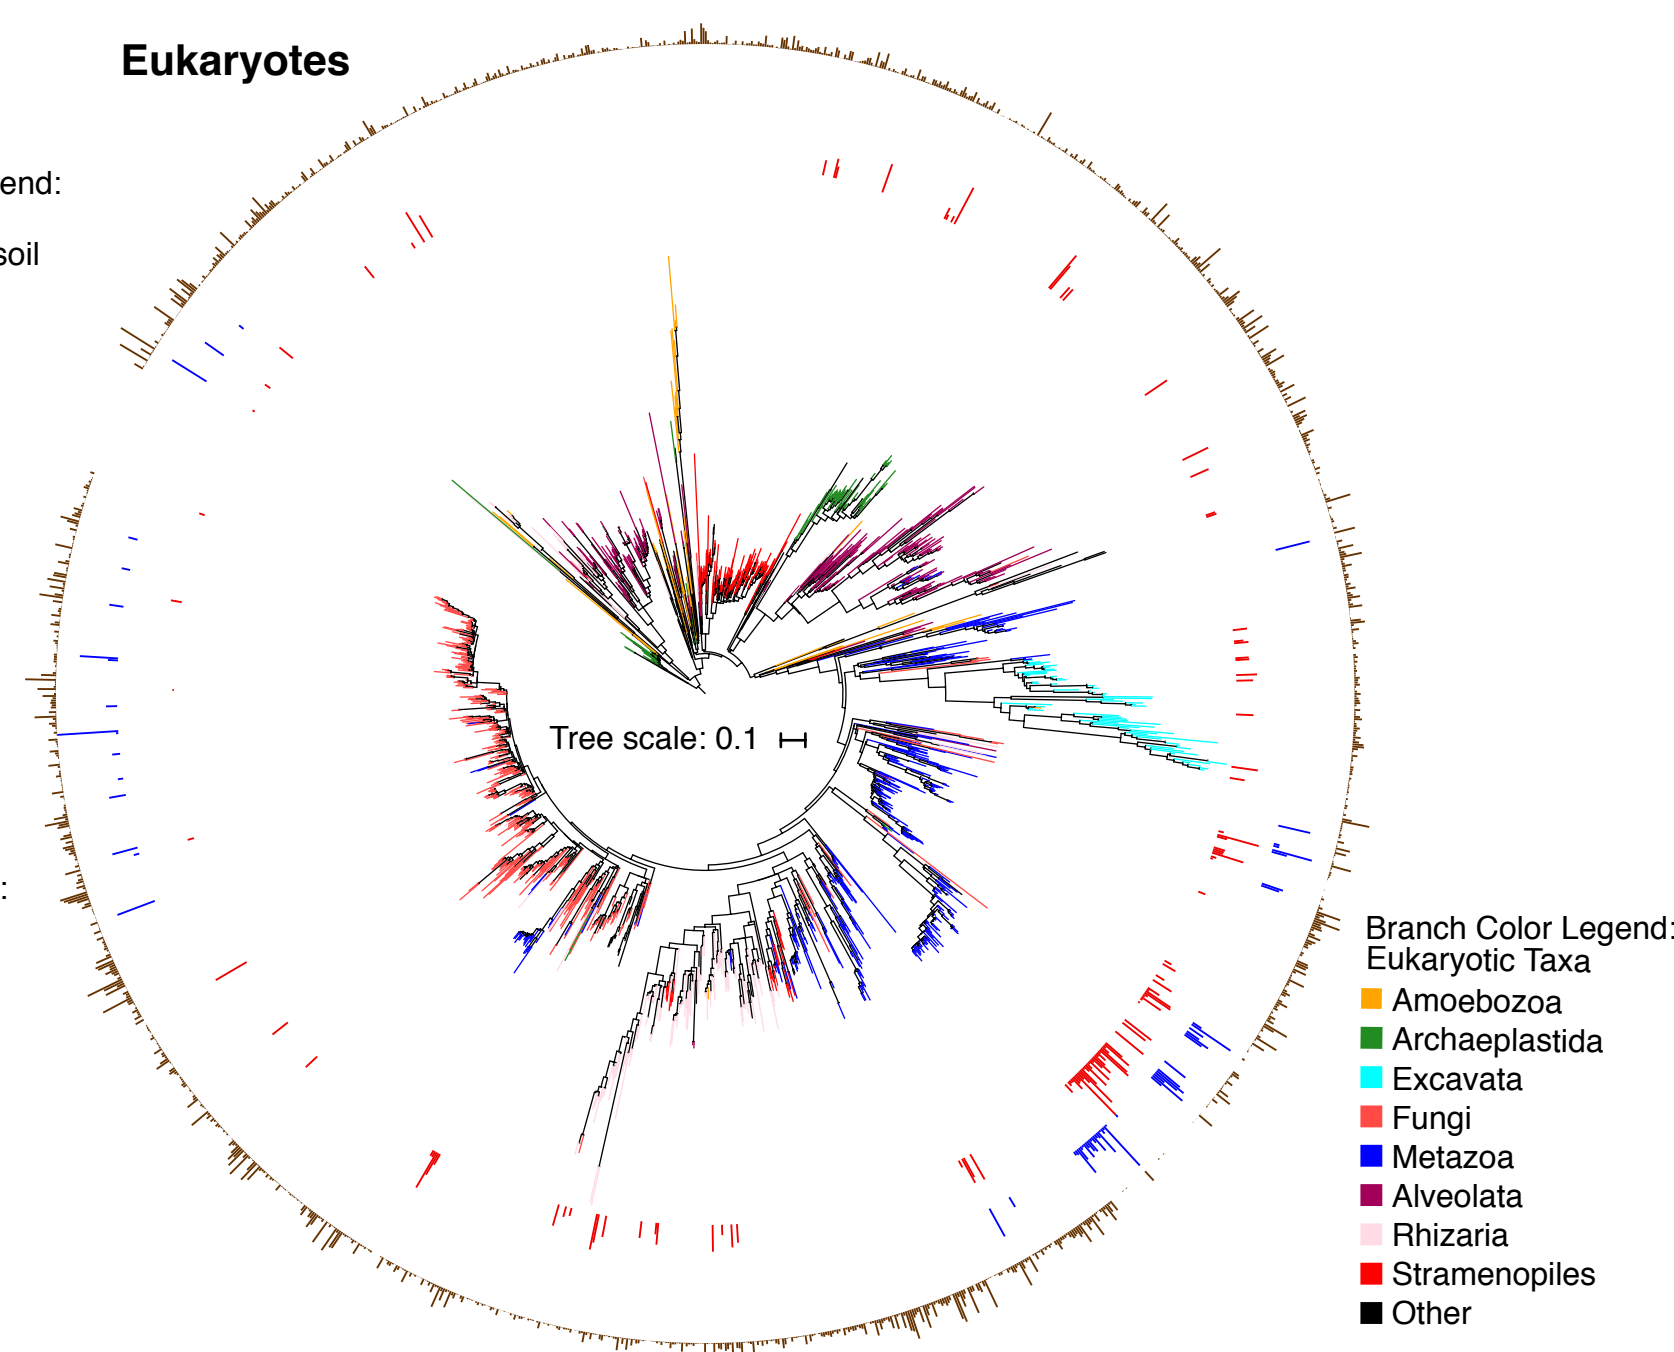

### Branch Color Legend:

#### Eukaryotic Taxa

- Amoebozoa
- Archaeplastida
- Excavata
- Fungi
- Metazoa
- Alveolata
- Rhizaria
- Stramenopiles
- Other
