# Supplementary figures and images for: 1.女子大学生の消費行動・性格特性と消費者被害の関連
Source: eLife journal article supplement (doi:10.7554/elife.36741), 2003-01-15

# *Sarracenia*

Shannon diversity

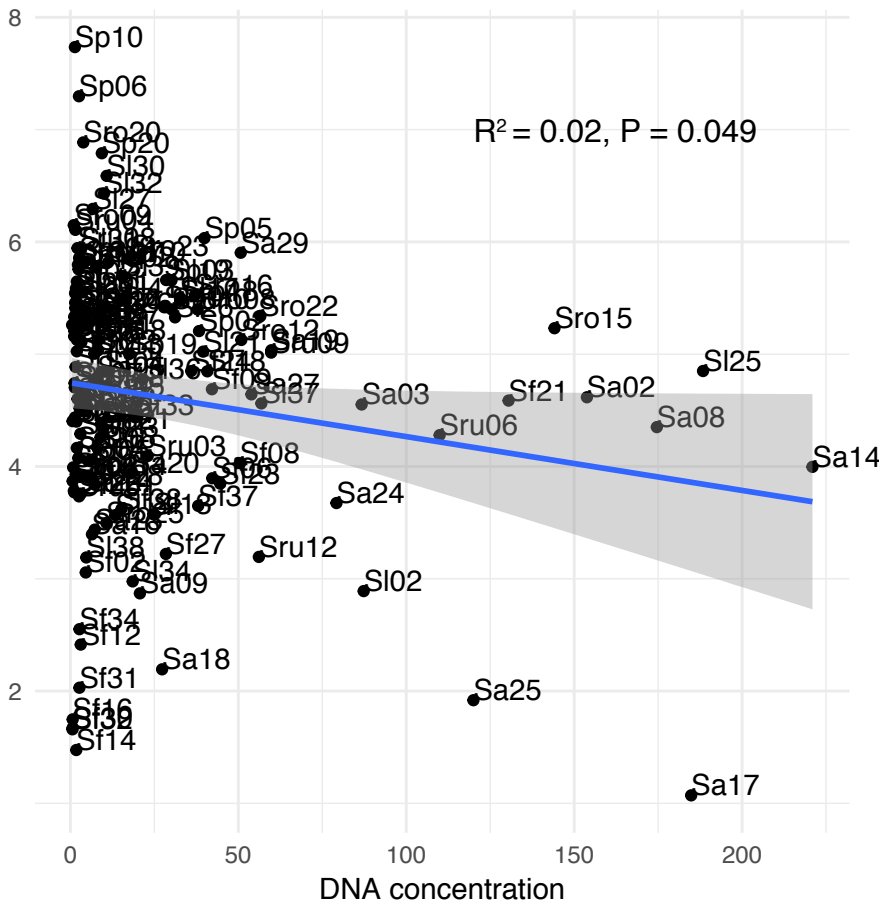

Supplement: supp [file elife-36741-supp-v1.zip]
